# Supplementary material
Source: HighWire-hosted journal article supplement (https://www.annfammed.org/highwire/filestream/9016/field_highwire_adjunct_files/0/Zubatsky_Supp_App.pdf)
Supplement: Zubatsky_Supp_App.pdf [file Zubatsky_Supp_App.pdf]

## Supplemental materials for:

Zubatsky M, Brieler J. A health systems genogram for improving hospital transitions to primary care. *Ann Fam Med*. 2018;16(6):566.

### Corresponding author

Max Zubatsky, PhD  
Department of Family and Community Medicine, Saint Louis University  
3700 Lindell Blvd #1129  
St Louis, MO 63108  
max.zubatsky@health.slu.edu

**Key words:** continuity; decision-making; family systems; health literacy; primary care

Submitted June 18, 2018; submitted, revised, August 20, 2018; accepted September 11, 2018.

**Funding support:** This study received support from a Primary Care Training and Enhancement grant through Health Resources Services and Administration (HRSA-16-042).

### References

1. Baird M, Blount A, Brungardt S, et al. Joint principles: integrating behavioral health care into the patient-centered medical home. *Ann Fam Med*. 2014;12(2):183-185.
2. Peek CJ. Integrated behavioral health and primary care: a common language. In: Talen MR, Valeras AB, eds. *Integrated Behavioral Health in Primary Care*. New York, NY: Springer; 2013: 9-31.
3. McGoldrick M, Gerson R, Petry SS. *Genograms: Assessment and intervention*. New York, NY: WW Norton & Company; 2008.

**Figure 1: Health Systems Genogram Example**

Health Systems Genogram

Patient: John Patient

Date: 2/1/18

Place Genogram Structure in this Box

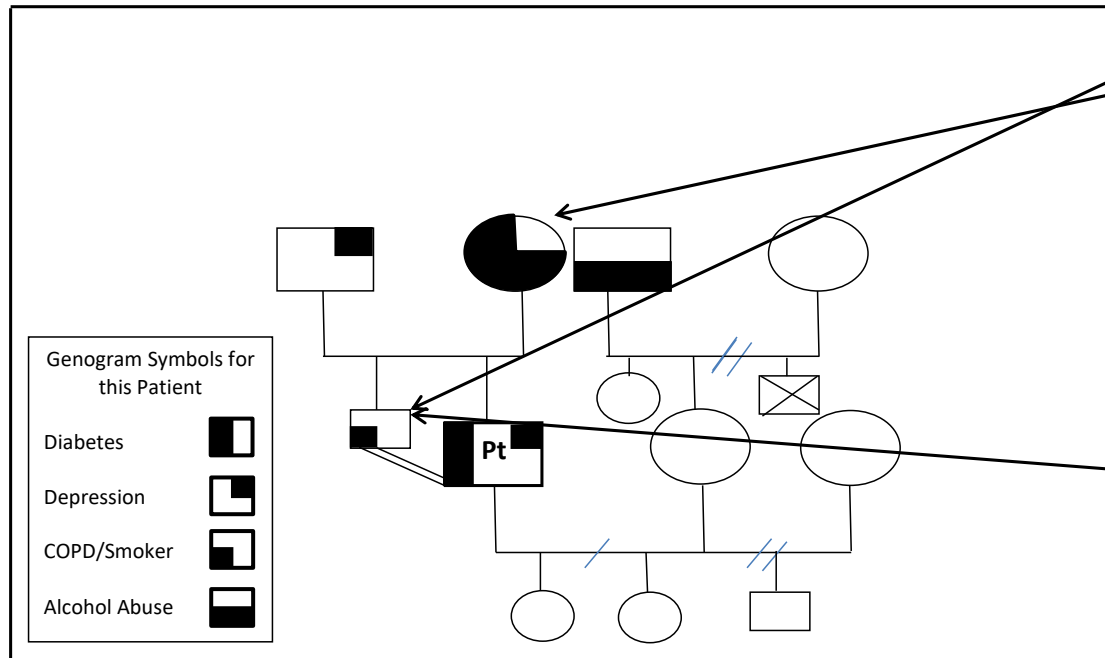

**Health Literacy Questions**

Who in your family do you talk to about your overall health?

**Older Brother  
Mother**

Who pays for your medications? If another person(s), please list:

**Patient**

Who sets out your medications? You or someone else?

**Patient**

Who helps in organizing your appointments?

**Older Brother**

Do you have any challenges in transportation to and from appointments? Y or N

**Does not own a car**

Who is the current healthcare provider(s) involved in your overall care? **PCP, Endocrinologist, Diabetes Educator, Patient Care Coordinator**

What location(s) do you receive any type of healthcare or service? **Downtown Medical Center, Metro Community Clinic**
